# Supplementary material for: Fecal microbiota imbalance in Mexican children with type 1 diabetes
Source: PubMed Central journal article supplement (PMC3898044; doi:10.1038/srep03814), 2014-01-22
Supplement: srep03814-s1.pdf [file srep03814-s1.pdf]

**Fecal microbiota imbalance in Mexican children with type 1 diabetes**

María Esther Mejía-León, Joseph F Petrosino, Nadim Jose Ajami, María Gloria

Domínguez-Bello and Ana María Calderón de la Barca

Table S1 | Sample characteristics

|                                | T1D cases   | Controls  | <i>p</i> value |
|--------------------------------|-------------|-----------|----------------|
| Age in years (SE)              | 12.3 (0.64) | 11 (1.04) | 0.3            |
| Delivery mode                  |             |           | 0.092          |
| Cesarean                       | 6           | 5         |                |
| Vaginal                        | 15          | 3         |                |
| Breastfeeding time             |             |           | 0.185          |
| <6 months                      | 11          | 2         |                |
| ≥6 months                      | 10          | 6         |                |
| Milk formula start             |             |           | 0.154          |
| <4months                       | 14          | 3         |                |
| ≥4 months                      | 7           | 5         |                |
| Infections per year            |             |           | 0.092          |
| ≥5                             | 15          | 3         |                |
| <5                             | 6           | 5         |                |
| Antibiotic treatments per year |             |           | 0.043          |
| ≥5                             | 14          | 2         |                |
| <5                             | 7           | 6         |                |
| HLA types « subjects (%) »     |             |           |                |
| Presence of any risk allele    | 21 (100)    | 4 (50)    |                |
| DR3-DQ2                        | 4 (19)      | 1 (12.5)  |                |
| DR4-DQ8                        | 3 (14.3)    | 0 (0)     |                |
| DQ2-DQ8                        | 2 (9.52)    | 0 (0)     |                |
| 3 isolated risk alleles        | 7 (33.3)    | 0 (0)     |                |
| 2 isolated risk alleles        | 3 (14.3)    | 0 (0)     |                |
| 1 isolated risk alleles        | 2 (9.52)    | 3 (37.5)  |                |
| Negative                       | 0 (0)       | 4 (50)    |                |

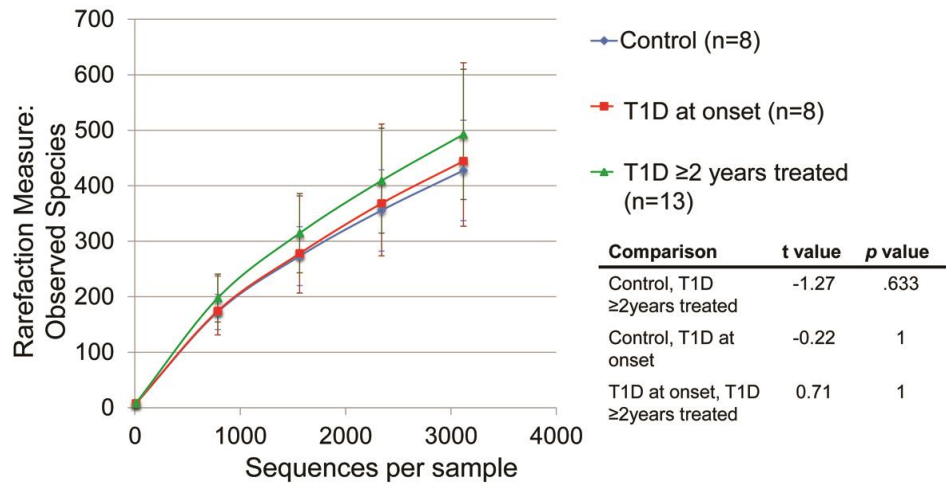

**Figure S1** | Rarefaction curves of observed species in fecal samples from T1D children between 7-18 years old and healthy controls.

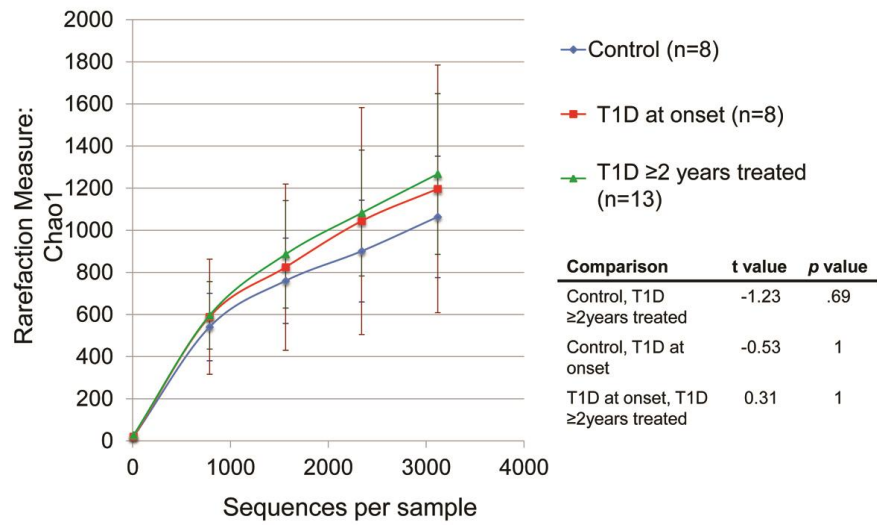

**Figure S2** | Rarefaction curves of Chao1 in fecal samples from T1D children between 7-18 years old and healthy controls. There were no significant differences between control and T1D groups.

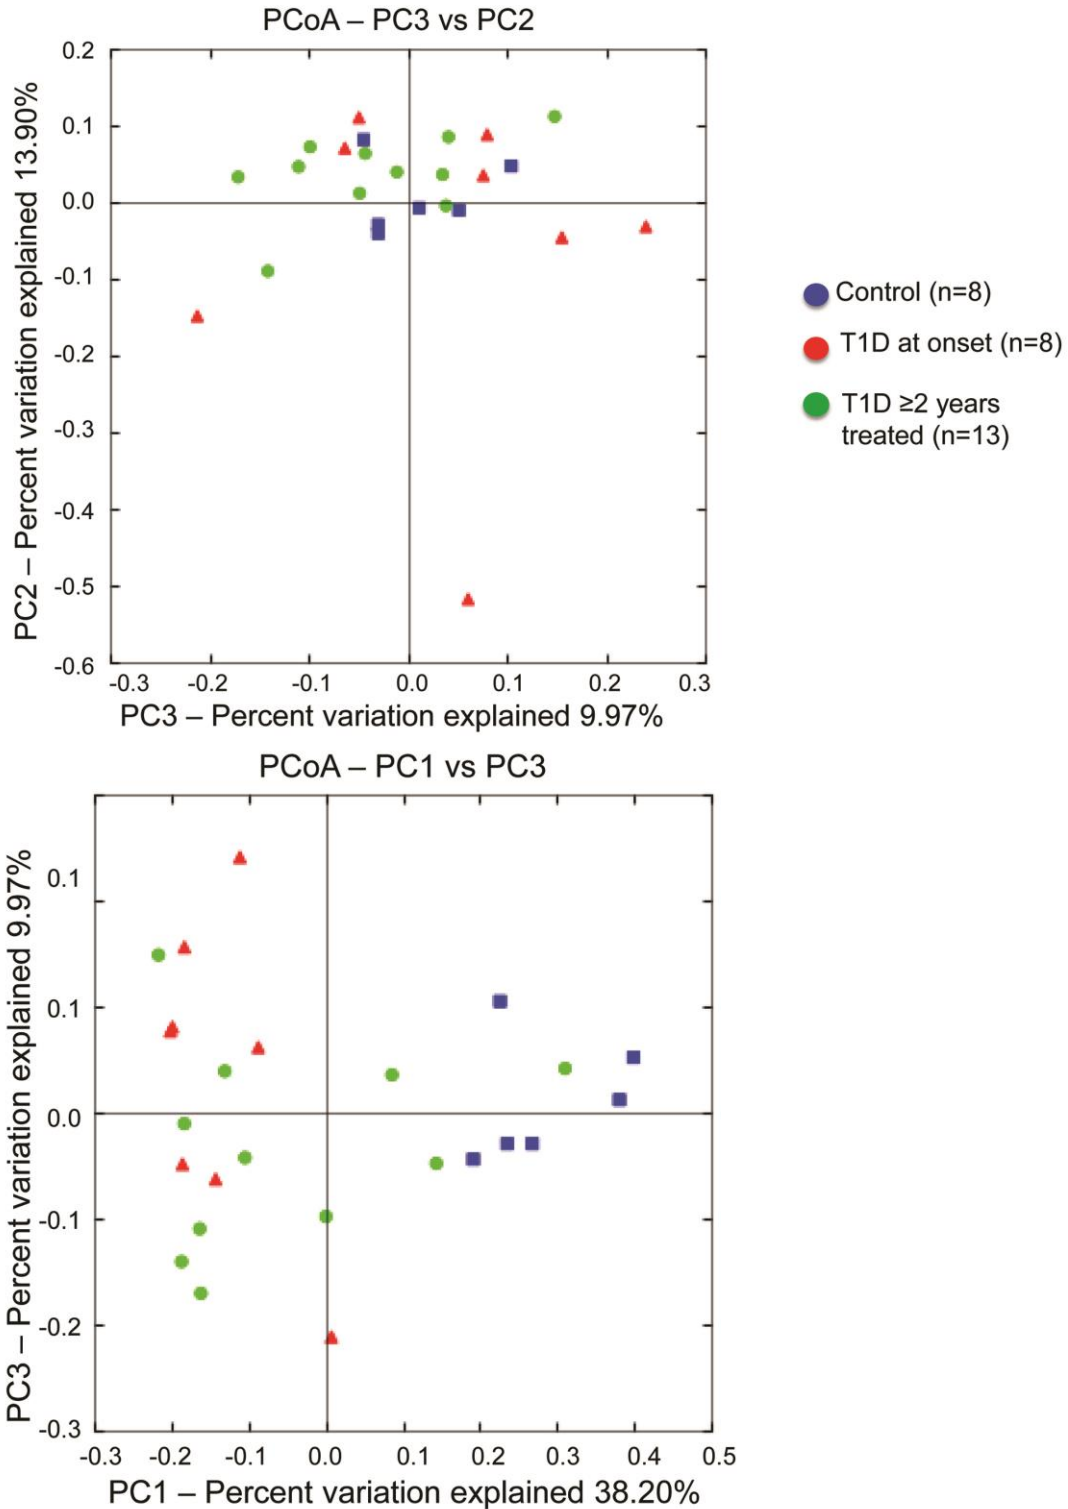

**Figure S3** | Principal Coordinate Analysis of fecal communities Unifrac distances in T1D and healthy children (components 2 and 3; weighted analysis). Principal coordinate 1 separates controls from T1D onset with the T1D>2y distributed between the two groups.

| Consensus Lineage                                                             | Control | T1D $\geq 2$ years treated | T1D at onset | #OTU ID |
|-------------------------------------------------------------------------------|---------|----------------------------|--------------|---------|
| Bacteroidetes; Bacteroidia; Bacteroidales; Prevotellaceae; <i>Prevotella</i>  | 14760   | 8796                       | 632          | 7082    |
| Bacteroidetes; Bacteroidia; Bacteroidales; Bacteroidaceae; <i>Bacteroides</i> | 2713    | 8824                       | 14279        | 9798    |

**Figure S4** | Heat map of the relative abundance *Prevotella* and *Bacteroides* in each children group. Controls have high dominance of *Prevotella*, and T1D onset has high dominance of *Bacteroides*, with the T1D $>2$ y distributed between the two types.

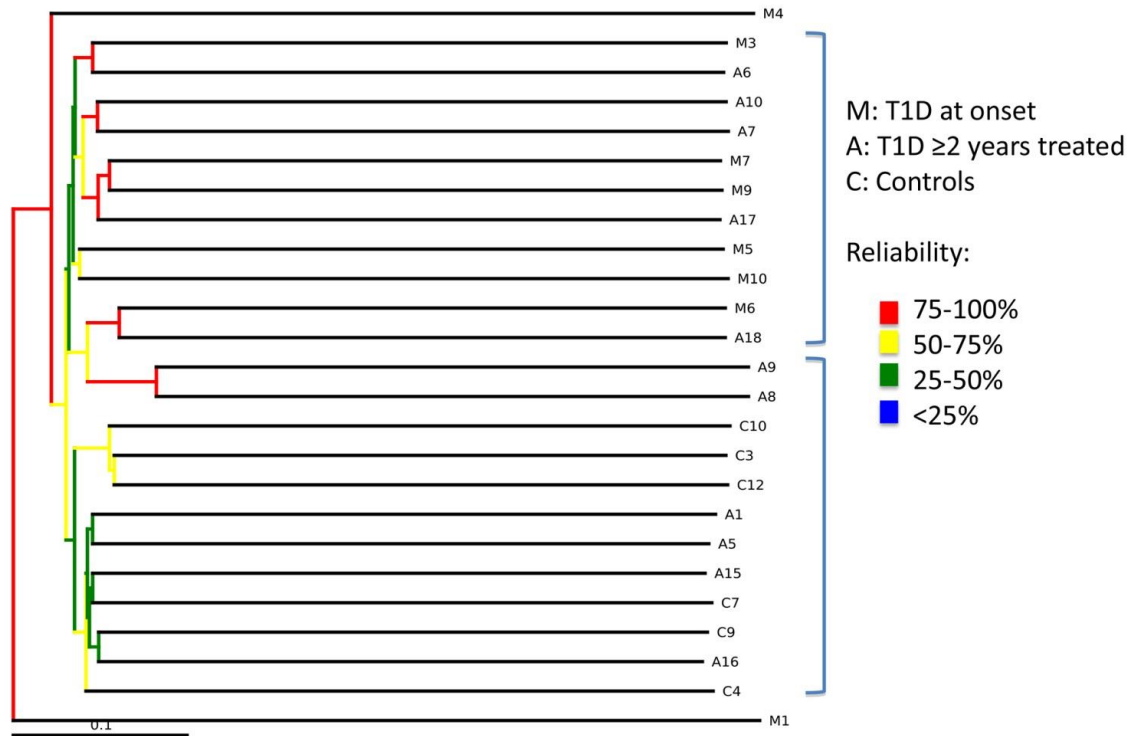

**Figure S5** | Clustering of fecal communities in T1D groups and controls based on phylogenetic distances. M (T1D onset) clusters in upper cluster and controls cluster in the bottom cluster with A (T1D >2y), distributed in the two clusters.
